# Supplementary material
Source: PubMed Central journal article supplement (PMC3791825)
Supplement: NIHMS54912-supplement-Supplementary_information.pdf [file NIHMS54912-supplement-Supplementary_information.pdf]

Desmoglein 1 membranous deficiency results in severe dermatitis, multiple allergies and metabolic wasting

## SUPPLEMENTARY INFORMATION

### **Desmoglein 1 deficiency results in severe dermatitis, multiple allergies and metabolic wasting**

Liat Samuelov<sup>1,20</sup>, Ofer Sarig<sup>1,20</sup>, Robert M Harmon<sup>2,20</sup>, Debora Rapaport<sup>3</sup>, Akemi Ishida-Yamamoto<sup>4</sup>, Ofer Isakov<sup>5</sup>, Jennifer L Koetsier<sup>2</sup>, Andrea Gat<sup>6</sup>, Ilan Goldberg<sup>1</sup>, Reuven Bergman<sup>7,8</sup>, Ronen Spiegel<sup>8,9</sup>, Ori Eytan<sup>1,10</sup>, Shamir Geller<sup>1</sup>, Sarit Peleg<sup>8,11,12</sup>, Noam Shomron<sup>5</sup>, Christabelle S M Goh<sup>13</sup>, Neil J Wilson<sup>13</sup>, Frances J D Smith<sup>13</sup>, Elizabeth Pohler<sup>13</sup>, Michael A Simpson<sup>14</sup>, W H Irwin McLean<sup>13</sup>, Alan D Irvine<sup>15-17</sup>, Mia Horowitz<sup>3</sup>, John A McGrath<sup>18</sup>, Kathleen J Green<sup>2,19</sup> & Eli Sprecher<sup>1,10</sup>

<sup>1</sup>Department of Dermatology, Tel Aviv Sourasky Medical Center, Tel Aviv, Israel. <sup>2</sup>Department of Pathology, Northwestern University Feinberg School of Medicine, Chicago, Illinois, USA. <sup>3</sup>Department of Cell Research and Immunology, Sackler Faculty of Medicine, Tel Aviv University, Ramat Aviv, Israel. <sup>4</sup>Department of Dermatology, Asahikawa Medical University, Asahikawa, Japan. <sup>5</sup>Department of Cell and Developmental Biology, Faculty of Medicine, Tel-Aviv University, Ramat-Aviv, Israel. <sup>6</sup>Department of Pathology, Tel Aviv Sourasky Medical Center, Tel Aviv, Israel. <sup>7</sup>Department of Dermatology, Rambam Health Care Campus, Haifa, Israel. <sup>8</sup>Rappaport Faculty of Medicine, Technion–Israel Institute of Technology, Haifa, Israel. <sup>9</sup>Institute of Human Genetics, Haemek Medical Center, Afula, Israel. <sup>10</sup>Department of Human Molecular Genetics & Biochemistry, Sackler Faculty of Medicine, Tel Aviv University, Ramat Aviv, Israel. <sup>11</sup>Pediatric Department B, Haemek Medical Center, Afula, Israel. <sup>12</sup>Pediatric Gastroenterology Unit, Haemek Medical Center, Afula, Israel. <sup>13</sup>Centre for Dermatology and Genetic Medicine, University of Dundee, Dundee, UK. <sup>14</sup>Division of Genetics and Molecular Medicine, King's College London (Guy's Campus), London, UK. <sup>15</sup>Paediatric Dermatology, Our Lady's Children's Hospital Crumlin, Dublin, Ireland. <sup>16</sup>National Children's Research Centre, Our Lady's Children's Hospital Crumlin, Dublin, Ireland. <sup>17</sup>Clinical Medicine, Trinity College Dublin, Dublin, Ireland. <sup>18</sup>St John's Institute of Dermatology, King's College London (Guy's Campus), London, UK. <sup>19</sup>Department of Dermatology, Northwestern University Feinberg School of Medicine, Chicago, Illinois, USA. <sup>20</sup>These authors contributed equally to this work. Correspondence should be addressed to E.S. (elisp@tlvmc.gov.il) or K.J.G. (kgreen@northwestern.edu).

Desmoglein 1 membranal deficiency results in severe dermatitis, multiple allergies and metabolic wasting

## **Supplementary Note**

### *Patient recruitment*

Patients and their families were referred for evaluation to our clinic. All affected and healthy family members or their legal guardian provided written and informed consent according to a protocol approved by our institutional review board and by the Israel National Committee for Human Genetic Studies in adherence to the Helsinki guidelines.

Desmoglein 1 membranal deficiency results in severe dermatitis, multiple allergies and metabolic wasting

### Supplementary Table 1

#### Exome sequencing details – family A

| <b>Family A</b>                                  | <b>II-1</b> | <b>II-2</b> |
|--------------------------------------------------|-------------|-------------|
| Total sequence (reads)                           | 83,607,454  | 88,089,786  |
| QC Passed Aligned reads<br>(duplicates removed)  | 66,646,163  | 80,004,380  |
| QC passed aligned to target<br>reads (+/-150 bp) | 57,396,818  | 65,757,675  |
| Mean read depth                                  | 99.84       | 105.51      |
| % of exome >1x                                   | 96.41       | 98.19       |
| % of exome >5x                                   | 89.09       | 96.60       |
| % of exome >10x                                  | 81.82       | 94.94       |
| % of exome >20x                                  | 72.00       | 90.36       |

Desmoglein 1 membranal deficiency results in severe dermatitis, multiple allergies and metabolic wasting

## Supplementary Table 2

### Exome sequencing details – family B

| <b>Family B</b>                                            | <b>IV-10</b> | <b>IV-8</b> | <b>III-2</b> | <b>IV-7</b> |
|------------------------------------------------------------|--------------|-------------|--------------|-------------|
| Total sequence (raw reads)                                 | 83,425,092   | 83,749,934  | 83,797,198   | 83,968,158  |
| Total sequence (clean reads)                               | 80,000,000   | 80,000,000  | 80,000,000   | 80,000,000  |
| QC Passed Aligned data to genome (duplicates removed)      | 6,688.65 Mb  | 6,639.69 Mb | 6,586.59 Mb  | 6,616.77 Mb |
| QC passed aligned data to target or near target (+/-200bp) | 3,891.96 Mb  | 5,782.83 Mb | 5,809.56 Mb  | 5,796.25 Mb |
| Mean read depth on target                                  | 40.88        | 61.18       | 61.97        | 61.65       |
| % of target >1x                                            | 99.00        | 99.10       | 99.20        | 98.90       |
| % of target >4x                                            | 97.50        | 98.10       | 98.10        | 97.80       |
| % of target >10x                                           | 94.60        | 96.40       | 96.40        | 96.20       |
| % of target >20x                                           | 82.20        | 92.20       | 92.10        | 92.00       |

Desmoglein 1 membranal deficiency results in severe dermatitis, multiple allergies and metabolic wasting

### Supplementary Table 3

#### Oligonucleotide sequences

| Exon / Gene                       | Sequence (5'-3')                                           | Product size (bp) | Tm |
|-----------------------------------|------------------------------------------------------------|-------------------|----|
| Genomic <i>DSG1</i> amplification |                                                            |                   |    |
| 1                                 | F-CTCCCTTGGTCTTGGATG<br>R-CAATGGGCACGATTATGAAG             | 128               | 52 |
| 2                                 | F-GACTCACAAGCCTATGGTTTC<br>R-GATGTTTAATTGGGAAAATTGG        | 299               | 57 |
| 3                                 | F-ATACCTTTCTTTATTGCTGTC<br>R-GTTATGCTTTGGAGTTG             | 185               | 50 |
| 4                                 | F-CACATGCAACAACCTCTC<br>R-GGATGCTCGTGAATTAAGA              | 384               | 50 |
| 5                                 | F-CATAATGCTCAAAGTAAGAAC<br>R-GGAAGCCACTACATTAC             | 235               | 51 |
| 6                                 | F-GAAGACAGTGAAGTCCACATC<br>R-GTTCCTTTGAGACCAAAAACCCAC      | 333               | 61 |
| 7                                 | F-TGATATTGCCTGTAATATG<br>R-ATGTAAGCAGAATTGTT               | 239               | 46 |
| 8                                 | F-AACATTACAGTATAAGC<br>R-GCCAAGTTTGTGAAATG                 | 356               | 49 |
| 9                                 | F-GATTTTCTTTCACCTGGAACG<br>R-GTTCAATATGTAAGGAAAATTAG       | 366               | 49 |
| 10                                | F-GCTCCATATTGCTAAGACT<br>R-GTCTATAATGCCCAGTG               | 434               | 49 |
| 11                                | F-CTTCCATTTTGAACGTTATTAC<br>R-GGGACACATATACATAGG           | 341               | 49 |
| 12                                | F-GCACCCAGTGCTAACTC<br>R-GCGGCCATCTTGGTTCA                 | 253               | 49 |
| 13                                | F-AAGCTAATGGAGAAAATGAAGAGG<br>R-TTCTAAGTACTCTTTGATGGTTGAGG | 527               | 49 |
| 14                                | F-CACATATTACAAGGCAAGTTG<br>R-AAGTGCTCAGGTCAGAGCT           | 472               | 50 |
| 15_1                              | F-TCCTCTTTGGAAATGCTCTGG<br>R-GTCCACTAACAACGGGCTCTG         | 341               | 50 |
| 15_2                              | F-TTGATCCTTCTTGGCCACCAC<br>R-CTCGCAAGTCAGGCATCTCTA         | 351               | 66 |
| 15_3                              | F-ACGATAACCGACCAGCATCAA<br>R-GTGGTGCCACTAATTCCAGTT         | 343               | 65 |
| 15_4                              | F-TAGCCAATGCCACAATGTCA<br>R-TCTAAACCACAATGACTATGA          | 365               | 66 |
|                                   |                                                            |                   |    |

Desmoglein 1 membranal deficiency results in severe dermatitis, multiple allergies and metabolic wasting

| Quantitative Real-Time PCR (qPCR) |                                                       |     |    |
|-----------------------------------|-------------------------------------------------------|-----|----|
| <i>DSG1</i>                       | F- CCCTCCAGTGTTTTCAATGGC<br>R- AATTGTTTCGGTTCATCTGCG  | 110 | 60 |
| <i>CCL5</i>                       | F- TGCCACATCAAGGAGTATTC<br>R- CCATCCTAGCTCATCTCCAAAG  | 150 | 60 |
| <i>IL-4</i>                       | F- CAAGCAGCTGATCCGATTCC<br>R- TCCAACGTA CTCTGGTTGGC   | 102 | 60 |
| <i>IL-5</i>                       | F- CAAGTGCATTGGTCAAAGAGAC<br>R- AGTGTGCCTATTCCCTGAAAG | 145 | 60 |
| <i>TSLP</i>                       | F- CCTAACCTTCAATCCCACCG<br>R- TTCTCCTCTTCTTCATTGCCTG  | 143 | 60 |
| <i>TNF<math>\alpha</math></i>     | F- ACTTTGGAGTGATCGGCC<br>R- GCTTGAGGGTTTGCTACAAC      | 139 | 60 |

Primers to screen for the *DSG1* c.49-1G>A mutation:

Forward: 5'-ATTTAATTAATAAAATAACTAGTGTGATTATCTTACCTTTTAC-3'

Reverse: 5'-GAAATAGAGGATGTTTAATTGGG-3'.

Primers to screen for the *DSG1* c.1861delG mutation:

Forward: 5'-AAGCTAATGGAGAAAATGAAGAGG-3'

Reverse: 5'-CTTTTTTCTTACCTGAGTTGTCAATGCATTCAATTATATTTCG-3'

Desmoglein 1 membranal deficiency results in severe dermatitis, multiple allergies and metabolic wasting

### Supplementary Figures

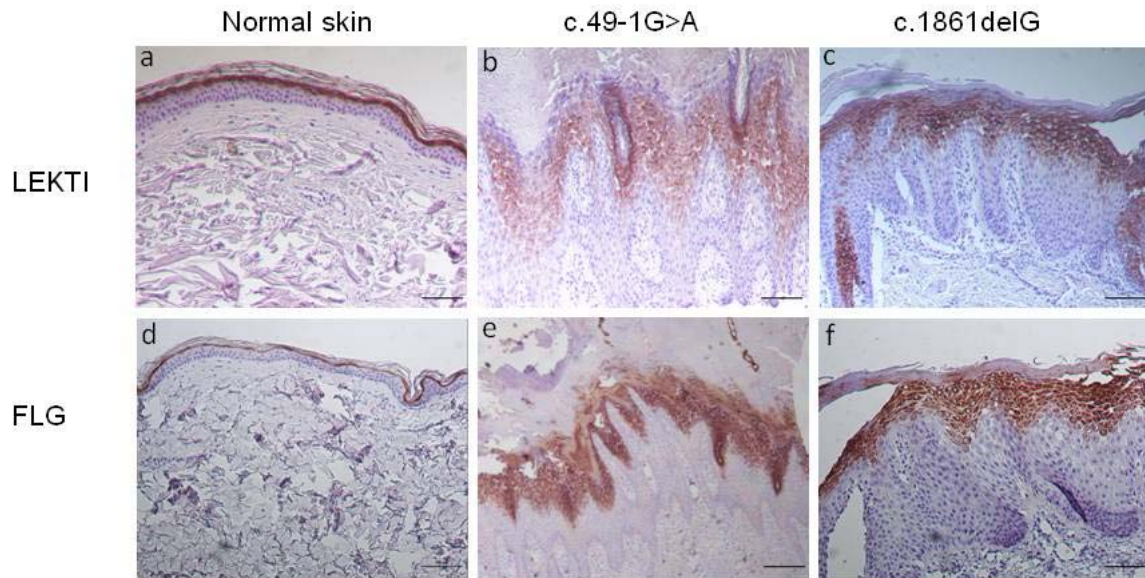

**Supplementary Figure 1.** Immunohistochemical staining for LEKTI and filaggrin in normal and desmoglein 1 deficient skin biopsies. Biopsies obtained from a healthy individual (a,d), from patient II-1 from family A (b,e) and from patient IV-10 from family B (c,f) were stained for LEKTI (a, b, c) and filaggrin (d, e, f,) (scale bar=100 $\mu$ m).

Desmoglein 1 membranous deficiency results in severe dermatitis, multiple allergies and metabolic wasting

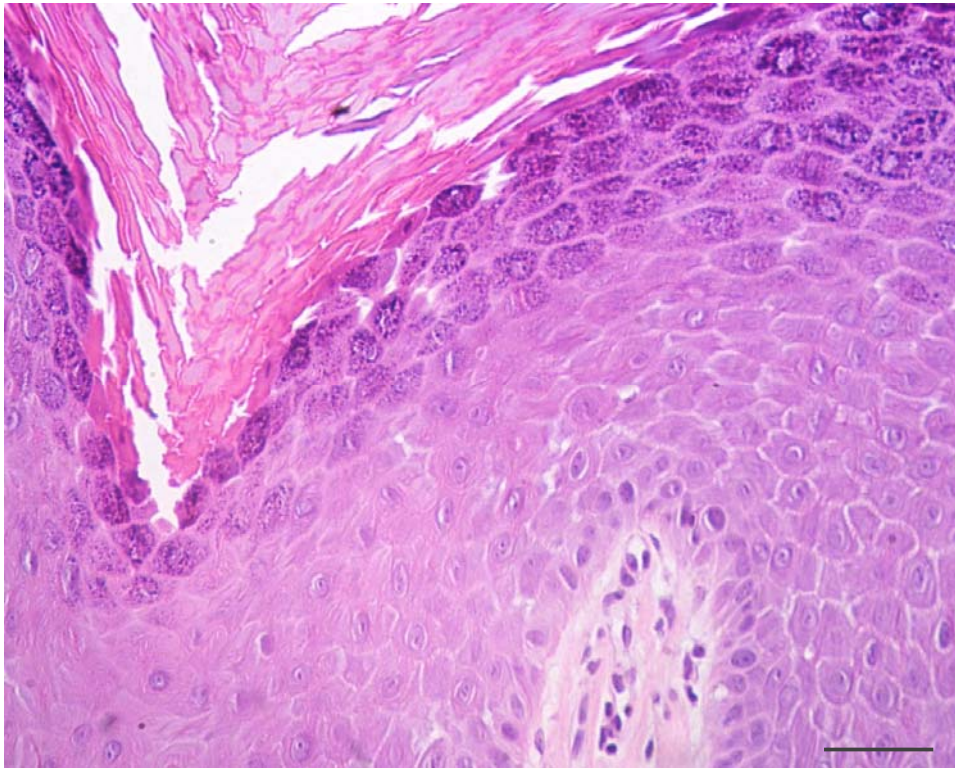

**Supplementary Figure 2.** Histopathological findings in an heterozygous carrier of c.1861delG in DSG1. A skin biopsy obtained from the palm of a heterozygous carrier of mutation c.1861delG in DSG1 demonstrates widened intercellular spaces mainly in the upper epidermal layers (hematoxylin and eosin; scale bar = 50  $\mu$ m).



Desmoglein 1 membranal deficiency results in severe dermatitis, multiple allergies and metabolic wasting

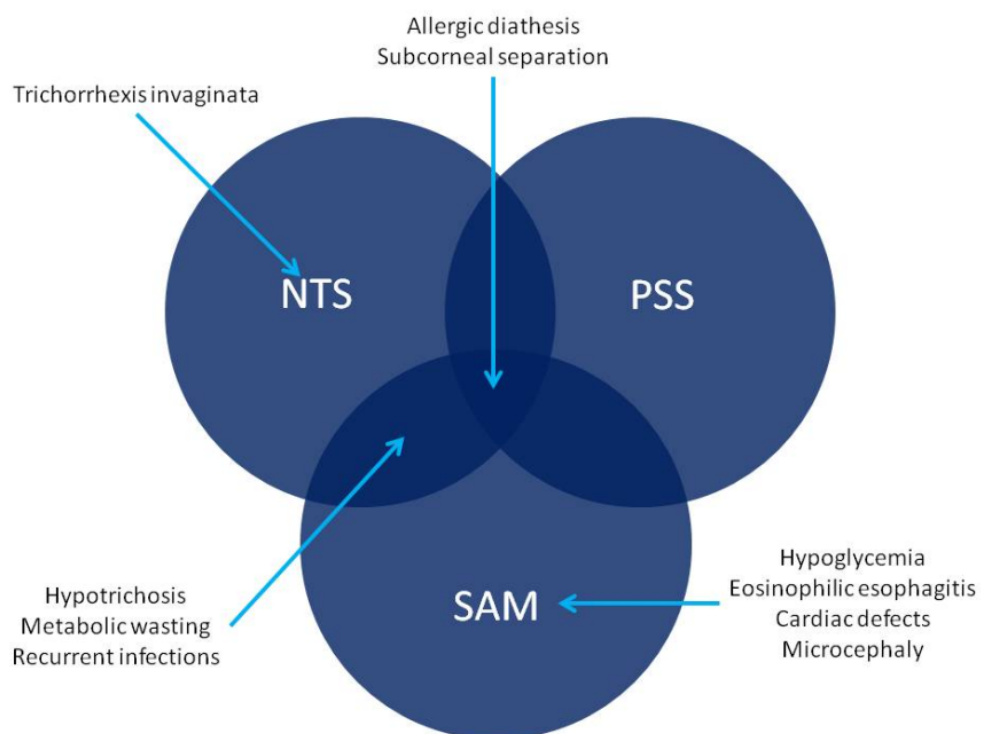

**Supplementary Figure 3.** Clinical features of the three inherited disorders associated with skin barrier disruption and allergic manifestations. NTS – Netherton syndrome; PSS – peeling skin syndrome type B; SAM - severe skin dermatitis, multiple allergies and metabolic wasting syndrome.

Desmoglein 1 membranial deficiency results in severe dermatitis, multiple allergies and metabolic wasting

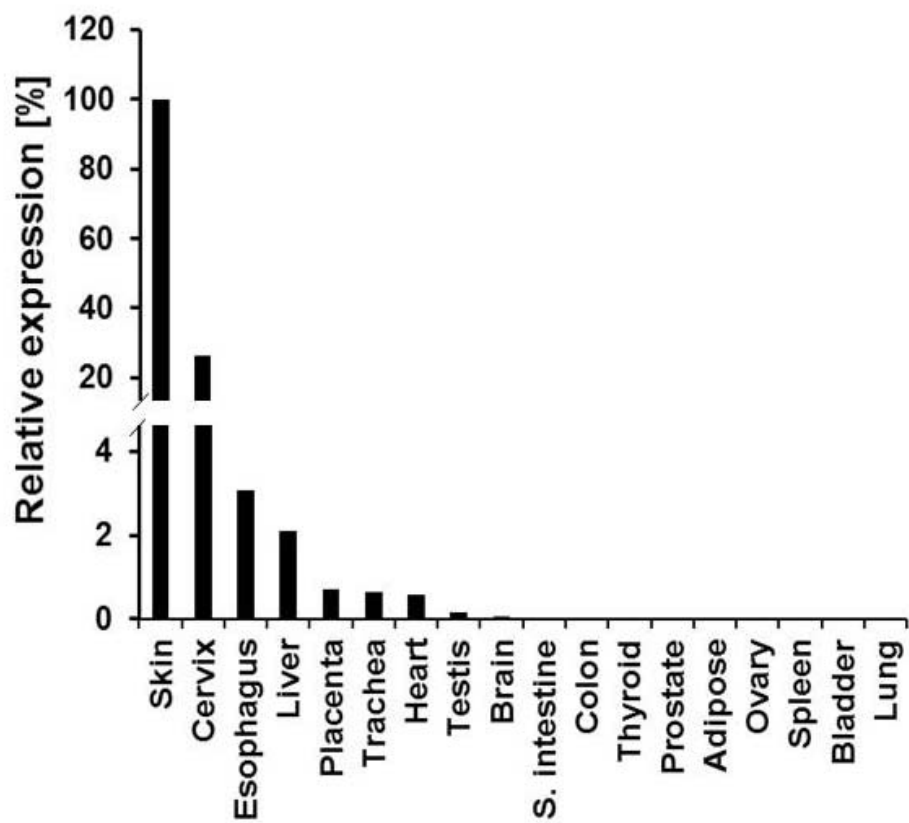

**Supplementary Figure 4.** DSG1 mRNA expression in normal human tissues.

Results are expressed as percentage of expression relative to gene expression

in skin  $\pm$  standard error.
